# Supplementary material for: The heritable natural competency trait of Burkholderia pseudomallei in other Burkholderia species through comE and crp
Source: PubMed Central journal article supplement (PMC6102250; doi:10.1038/s41598-018-30853-4), 2018-08-20

**The heritable natural competency trait of *Burkholderia pseudomallei* in other *Burkholderia* species through *comE* and *crp***

Yun Heacock-Kang<sup>1</sup>, Ian A. McMillan<sup>1,2</sup>, Jan Zarzycki-Siek<sup>1</sup>, Zhenxin Sun<sup>1</sup>, Andrew P. Bluhm<sup>1</sup>, Darlene Cabanas<sup>1</sup>, and Tung T. Hoang<sup>1,2\*</sup>

<sup>1</sup>*Department of Microbiology*, <sup>2</sup>*Department of Molecular Biosciences and Bioengineering, University of Hawaii at Manoa, Honolulu, Hawaii, USA*

\* Address correspondence to Tung T. Hoang, Tel: +1 808 956 3522; Fax: +1 808 956 5339; e-mail: [tongh@hawaii.edu](mailto:tongh@hawaii.edu)

**Supplementary Figure S1** | Nucleotide alignments comparing the native and altered versions of *comE* (a) and *crp* (b) showing the changes in sequence throughout the entire gene to reduce the possibility of recombination. Amino acid alignments comparing native and altered versions of *comE* (c) and *crp* (d) showing 100% identity of the protein sequence. Residues highlighted by red indicate a change in sequence. Sequence conservation is shown by pink bars below the sequence. Alignments were carried out in CLC sequence viewer.

**a**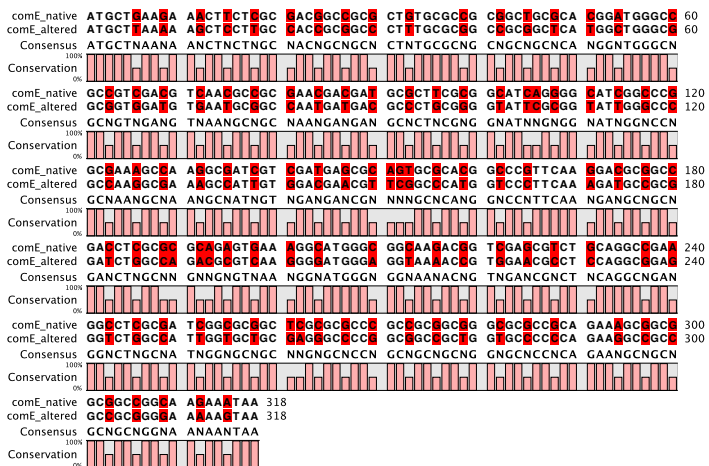**c**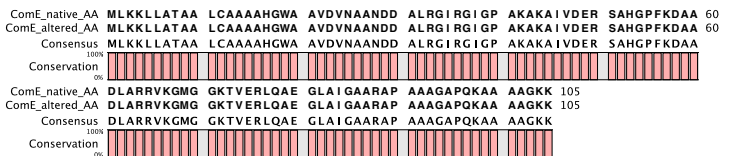**d**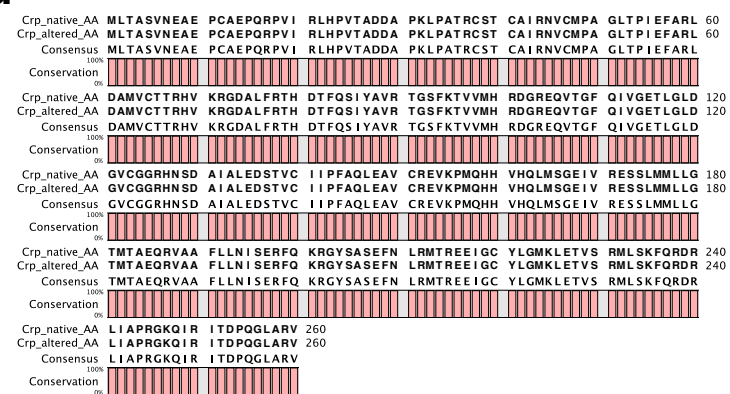**b**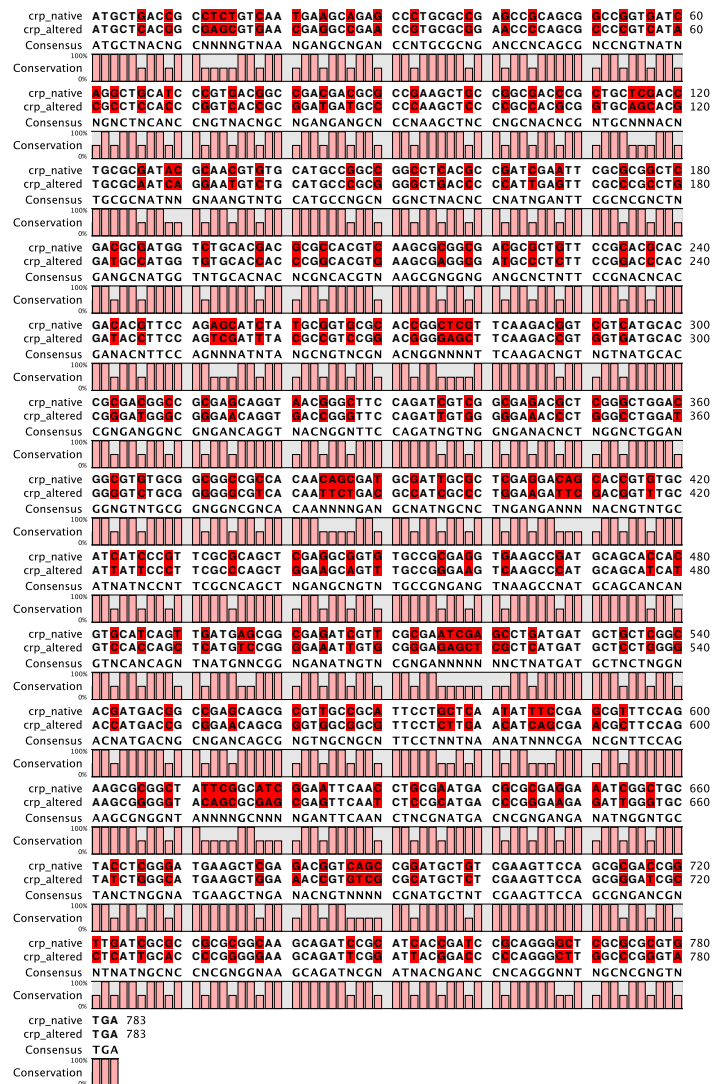

Supplement: 41598_2018_30853_MOESM1_ESM.pdf [file 41598_2018_30853_MOESM1_ESM.pdf]
